# Supplementary material for: Age at puberty and risk of asthma: A Mendelian randomisation study
Source: PLoS Med. 2018 Aug 7;15(8):e1002634. doi: 10.1371/journal.pmed.1002634 (PMC6080744; doi:10.1371/journal.pmed.1002634)
Supplement: S4 Table — (XLSX) [file pmed.1002634.s004.xlsx]

## Sheet: S4 Table
Supplementary Table 4. Results of main and secondary MR analyses of asthma and age at voice breaking in males. "Pleiotropy" = statistical evidence of pleiotropy: I2 [95%CI] and heterogeneity p-value, het_P, for the IVW method; p-value of the slope of the regression line, Slope_P, for MR-Egger regression. LCL and UCL: lower and upper confidence limits.
	Early vs Normal age at voice breaking (n=24 SNPs)					Late vs Normal age at voice breaking (n=37 SNPs)
	OR	LCL	UCL	p	Pleiotropy	OR	LCL	UCL	p	Pleiotropy
Two sample MR
IVW - Fixed-effect (main analysis)	1.074	0.996	1.157	0.064	I2= 2 [0-46]; het_P=0.436	0.926	0.865	0.992	0.029	I2= 0 [0-37]; het_P=0.697
IVW - Random-effect	1.073	0.995	1.158	0.067		0.926	0.865	0.992	0.029
Weighted median estimator	1.134	1.021	1.26	0.018		0.882	0.799	0.973	0.012
MR Egger regression	1.248	0.951	1.639	0.111	Slope_P=0.302	0.896	0.744	1.079	0.246	Slope_P=0.754
One-sample MR	1.08977	1.00645	1.17999	0.03414		0.925044	0.860507	0.99442	0.034717
Analysis accounting for correlation	1.076	0.99699	1.1618	0.0597		0.928888	0.866046	0.996289	0.0357
Analyses with BMI SNPs removed
	Early vs Normal age at voice breaking (n=19 SNPs)					Late vs Normal age at voice breaking (n=30 SNPs)
	OR	LCL	UCL	p	Pleiotropy	OR	LCL	UCL	p	Pleiotropy
Two sample MR
IVW - Fixed-effect	1.062	0.977	1.155	0.15658	I2= 17 [0-52]; het_P=0.247	0.949	0.88	1.023	0.172119	I2= 0 [0-41]; het_P=0.611
IVW - Random-effect	1.06	0.965	1.164	0.222686		0.949	0.88	1.023	0.172119
Weighted median estimator	1.08904	0.961128	1.23397	0.181		0.882412	0.79089	0.984524	0.025
MR Egger regression	1.27378	0.920498	1.76265	0.144	Slope_P=0.294	0.864753	0.708252	1.05584	0.154	Slope_P=0.325
Analyses varying the cut-off of >15 for asthma onset used to define post-pubertal asthma
	Early vs Normal age at voice breaking (n=24 SNPs)					Late vs Normal age at voice breaking (n=37 SNPs)
	OR	LCL	UCL	p	Pleiotropy	OR	LCL	UCL	p	Pleiotropy
Asthma onset >16	1.078	1	1.163	0.051	I2= 0 [0-45]; het_P=0.531	0.925	0.863	0.991	0.027	I2= 0 [0-37]; het_P=0.707
Asthma onset >17	1.082	1.003	1.168	0.041	I2= 0 [0-45]; het_P=0.548	0.925	0.863	0.991	0.028	I2= 0 [0-37]; het_P=0.723
Analyses stratified by BMI (below/above median)
	Early vs Normal age at voice breaking (n=24 SNPs)					Late vs Normal age at voice breaking (n=37 SNPs)
	OR	LCL	UCL	p	Pleiotropy	OR	LCL	UCL	p	Pleiotropy
BMI < 27.3 (n=96,402)	1.045	0.936	1.166	0.434	I2= 0 [0-45]; het_P=0.597	0.968	0.875	1.071	0.526	I2= 0 [0-37]; het_P=0.533
BMI >= 27.3 (n=95,665)	1.087	0.982	1.203	0.109	I2= 0 [0-45]; het_P=0.666	0.902	0.822	0.99	0.0295	I2= 0 [0-37]; het_P=0.974
				Interaction p-value = 0.487					Interaction p-value = 0.313
